# Supplementary material
Source: HighWire-hosted journal article supplement (https://jnis.bmj.com/content/10/7/625)
Supplement: inline-supplementary-material-1 [file inline-supplementary-material-1.docx]

Supplementary Table

Supplementary Table 1: Univariate analysis of risk for intracranial hemorrhage

| Characteristics | ICH | No ICH | p-value |
| --- | --- | --- | --- |
| Age (years), mean, (SD) | 70 (10) | 68 (17) | 0.02* |
| NIHSS score at admission, median (IQR) | 19 (15-22) | 17 (15-22) | 0.24 |
| Wake up stroke, n (%) | 6 (12) | 11(13) | 0.84 |
| Baseline ASPECTS, median, (IQR) | 7(6-9) | 7(6-9) | 0.88 |
| IVT, n (%) | 37(73) | 47 (55) | 0.05* |
| Anterior collaterality, n (%) | 48 (92) | 38(84) | 0.78 |
| Onset to treatment (min), median (IQR) |  |  |  |
| Onset to Imaging | 143(118-164) | 120 (90-150) | 0.05* |
| Onset to groin puncture | 255(201-315) | 214 (160-288) | 0.2 |
| Imaging to groin puncture | 94 (60-174) | 81 (55-135) | 0.27 |
| Onset to recanalization | 321 (253-378) | 280 (210-340) | 0.03* |
| Final mTICI, n (%) |  |  |  |
| ≤ 2a | 14 (28) | 16 (19) |  |
| ≥ 2b | 37 (73) | 69 (81) | 0.62 |

ICH indicates intra cranial hemorrhage; NIHSS, National Institute of Health Stroke Scale; IVT, Intravenous Thrombolysis; mTICI, modified Thrombolysis In Cerebral Infarction; ASPECTS, Alberta Stroke Program Early CT Score.
